# Supplementary material for: Persistent delirium is associated with cerebrospinal fluid markers of neuronal injury
Source: PubMed Central journal article supplement (PMC11443447; doi:10.1093/braincomms/fcae319), 2024-09-18
Supplement: fcae319_supplementary_data.pdf [file fcae319_supplementary_data.pdf]

## Supplementary methods

### *Amyloid beta 42 and 40 (A $\beta$ 42, 40)*

CSF sAPP $\alpha$ , sAPP $\beta$  (cat. no. K15120E), NfL, GFAP (in-house assays as previously described in detail,<sup>1,2</sup> were measured by ELISA. P-tau (cat. no. 230350), amyloid  $\beta$  1–40 (A $\beta$ 40; cat. no. 231524), and 1–42 (A $\beta$ 42; cat. no. 230336) were analysed by an architectural platform (xMAP Multiplex; Luminex Corporation) and a kit (INNO-BIA AlzBio3; Fujirebio). The A $\beta$ 42/A $\beta$ 40 ratio was calculated and used as a marker of amyloid accumulation.<sup>3</sup>

In brief, Innogenetics kit reagents included well-characterised capture monoclonal antibodies specific for A $\beta$ <sub>1-42</sub>(4D7A3), t-tau(AT120), and p-tau<sub>181p</sub> (AT270), each chemically bonded to unique sets of color-coded beads, and analyte-specific detector antibodies (HT7, 3D6). Calibration curves were produced for each biomarker using aqueous buffered solutions that contained the combination of three biomarkers at concentrations ranging from 56 to 1,948pg/ml for recombinant tau, 27 to 1,574pg/ml for synthetic A $\beta$ <sub>1-42</sub> peptide, and 8 to 230pg/ml for a tau synthetic peptide phosphorylated at the threonine 181 position (ie, the p-tau<sub>181p</sub> standard).

### *Tau markers (p-tau)*

The levels of CSF p-tau (<sub>181P</sub>) was determined using a sandwich ELISA (INNOtest<sup>®</sup> hTAU-Ag p-Tau (<sub>181P</sub>); Fujirebio Europe N.V., Gent, Belgium) constructed to measure both normal tau and phosphorylated tau. Briefly, for the hTAU Ag assay, tau protein is captured from CSF samples by a monoclonal anti-tau antibody (AT120) bound to a microtiter plate. Captured tau is detected with two biotinylated tau-specific monoclonal antibodies (HT7 and BT2). Similarly, for the t-tau assay, p-tau (<sub>181P</sub>) is captured from CSF samples by anti-tau antibody HT7 bound onto a microtiter plate. Captured p-tau (<sub>181P</sub>) is detected with a biotinylated monoclonal anti-p-tau antibody (AT270). In both assays, peroxidase-labelled streptavidin and tetramethylbenzidine (TMB) substrate are also added. Peroxidase-catalysed hydrolysis produces a colorimetric signal. Sample concentrations are extrapolated from a standard curve, fitted using a 4-parameter logistic algorithm. Intra-assay CVs were less than 20%.

### *Neurofilament light (NFL)*

NFL was measured using the commercially available NF-Light ELISA, according to the manufacturer's instructions (UmanDiagnostics, Umeå, Sweden). Briefly, samples were diluted 1:2 with sample diluent and added in duplicate to microplate wells coated with a monoclonal capture antibody specific for NFL. Samples were incubated with a biotinylated NFL-specific monoclonal detection antibody. The detection complex was completed with the addition of horseradish peroxidase-labelled streptavidin and TMB substrate. Peroxidase-catalysed hydrolysis produces a colorimetric signal. Sample concentrations were extrapolated from a standard curve, fitted using a

4-parameter logistic algorithm. Intra-assay CVs were less than 10%. Samples were run on two different days by different operators; the inter-assay CV was below 16%.

*Glial fibrillary acidic protein (GFAP)*

CSF GFAP levels were quantified for all cohorts on the Simoa HD-X (Quanterix) using the commercial single-plex assay (No. 102336).

## Supplementary Figure 1

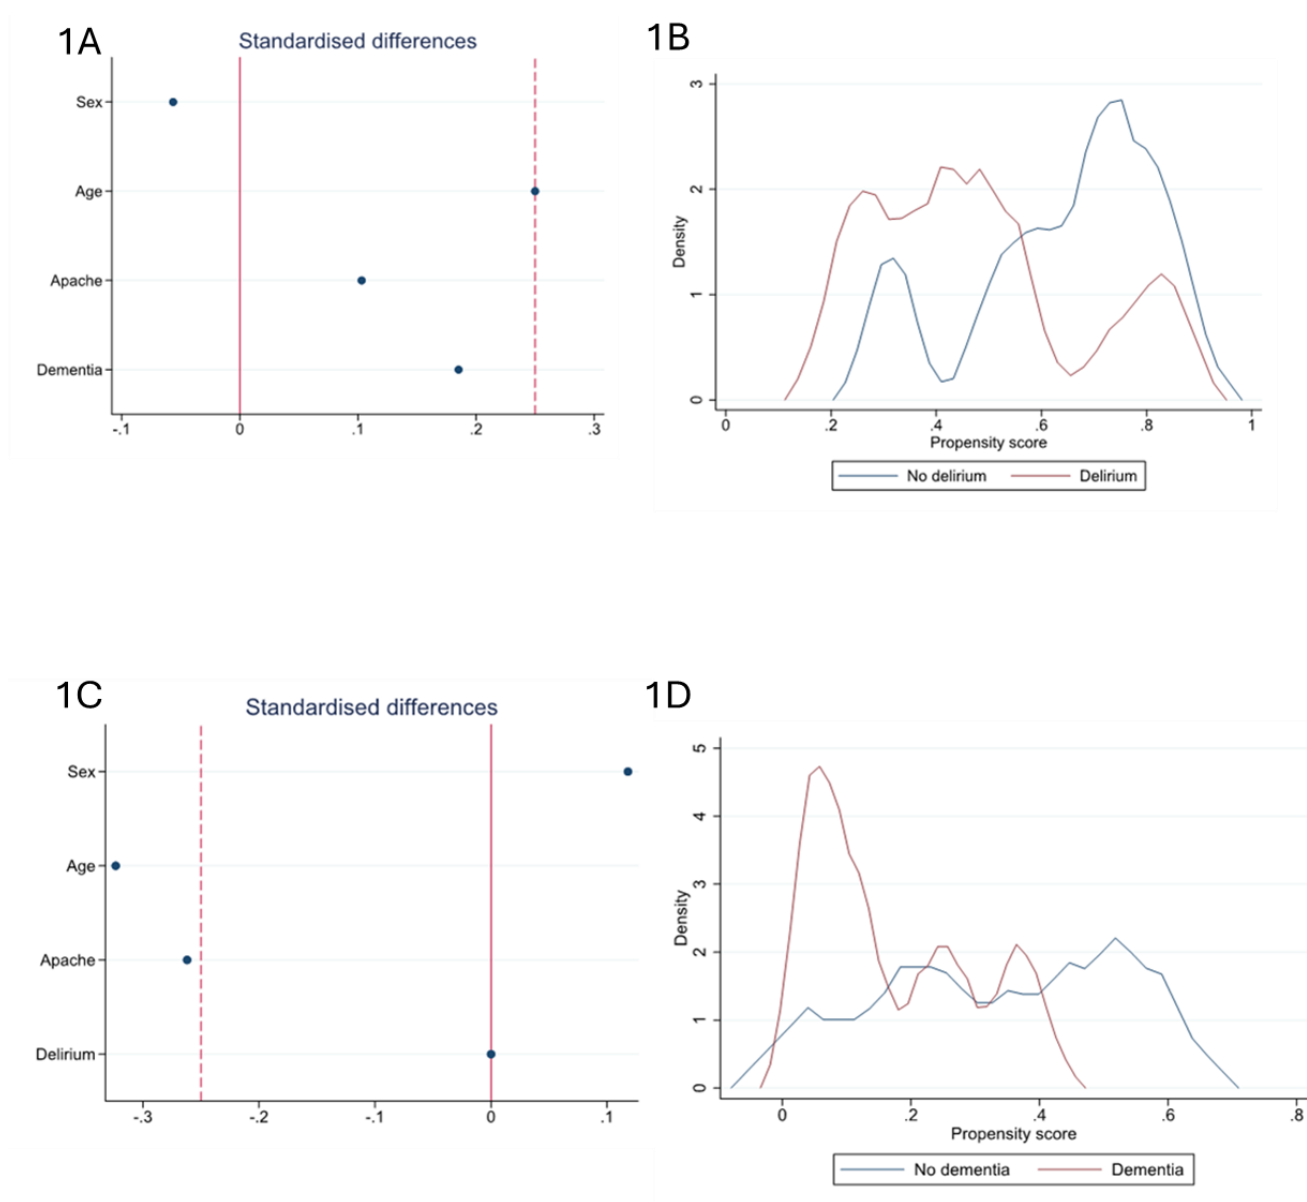

**1A:** standardised differences for propensity score matching for delirium model. **1B:** propensity score overlap for delirium and no delirium as exposures. **1C:** standardised differences for propensity score matching for dementia model. **1D:** propensity score overlap for dementia and no dementia as exposures.

**Supplementary Table 1: REDEEMS guidelines**

| Item number | REDEEMS items                                                                                                                                                                                                                        |
|-------------|--------------------------------------------------------------------------------------------------------------------------------------------------------------------------------------------------------------------------------------|
| <b>1</b>    | <b>Study rationale</b>                                                                                                                                                                                                               |
| a           | <p>State the biomarker under study (including nature of the specimen)</p> <p>Cerebrospinal fluid neurofilament light, phosphorylated tau 181, glial fibrillary acidic protein, amyloid beta 40, amyloid beta 42</p> <p>p3 para 2</p> |
| b           | <p>Describe the biological hypothesis(/es) tested*</p> <p>CSF biomarkers in patients with delirium may quantitatively differ from patients with dementia alone</p> <p>p3 para 2</p>                                                  |
| <b>2</b>    | <b>Ascertainment of delirium</b>                                                                                                                                                                                                     |
| a           | <p>Describe the training and/or credentials of personnel who ascertained delirium cases</p> <p>Delirium was ascertained by a consultant geriatrician</p> <p>p5 para 2</p>                                                            |
| b           | <p>Specify the delirium tool and/or diagnostic process that was used to ascertain cases</p> <p>Confusion assessment method (CAM) and delirium index (DI)</p> <p>p5 para 2</p>                                                        |
| c           | <p>Describe frequency, timing and duration of delirium assessment</p> <p>Daily from day of admission, at random times of working day, up to ten times during inpatient day.</p> <p>p5 para 2</p>                                     |
| <b>3</b>    | <b>Outcome measures</b>                                                                                                                                                                                                              |
| a           | <p>Define and justify all clinical endpoint(s) and their measures (including relationship to delirium where relevant)</p> <p>CSF biomarkers</p> <p>p5 para 3</p>                                                                     |
| <b>4</b>    | <b>Assay procedure</b>                                                                                                                                                                                                               |

| Item number | REDEEMS items                                                                                                                                                                                                                                                                                                                                    |
|-------------|--------------------------------------------------------------------------------------------------------------------------------------------------------------------------------------------------------------------------------------------------------------------------------------------------------------------------------------------------|
| a           | <p>Specify the assay method used with a detailed protocol that includes reagents/kits</p> <p>p5 para 3<br/>Supplementary material</p>                                                                                                                                                                                                            |
| b           | <p>Describe the methods of preservation, storage and processing of the biological sample</p> <p>p5 para 3<br/>Supplementary material</p>                                                                                                                                                                                                         |
| c           | <p>Describe the assay validation method for repeatability and robustness including the sensitivity limits of the assay</p> <p>Supplementary material</p>                                                                                                                                                                                         |
| d           | <p>Specify the inter- and intra- assay coefficients of variation</p> <p>Supplementary material</p>                                                                                                                                                                                                                                               |
| e           | <p>Specify the method of blinding biomarker results</p> <p>Biomarker assays were performed by an independent research lab blinded to delirium/ dementia status of each patient</p> <p>p5 para 3</p>                                                                                                                                              |
| <b>5</b>    | <b>Timing of collection of the biological sample</b>                                                                                                                                                                                                                                                                                             |
| a           | <p>Precisely describe the time of collection of the biological sample in relation to delirium (onset, presence, resolution)</p> <p>CSF collected after day 5 of ongoing persisting delirium without resolution</p> <p>p5 para 3</p>                                                                                                              |
| b           | <p>Provide a rationale for the timing of the sample collection based on the clinical scenario, the hypothesis being tested, and/or the study design</p> <p>Five days offer sufficient ascertainment of delirium with regards to its inherent fluctuations, while including sufficient “dosage” to maximise biomarker signal</p> <p>p5 para 2</p> |
| <b>6</b>    | <b>Confounding variables</b>                                                                                                                                                                                                                                                                                                                     |
| a           | <p>State the confounding variables assessed and whether or not they were specified <i>a priori</i></p>                                                                                                                                                                                                                                           |

| Item number | REDEEMS items                                                                                                                                                                                                                                                                                                            |
|-------------|--------------------------------------------------------------------------------------------------------------------------------------------------------------------------------------------------------------------------------------------------------------------------------------------------------------------------|
|             | <p><i>Age, sex, Apache score (acute component) and persistent delirium/ dementia diagnosis</i></p> <p>p7 para 2</p>                                                                                                                                                                                                      |
| b           | <p>Clearly define and provide justification for the confounding variables (including the relationship to delirium where relevant)</p> <p>All have hypothesised effects on delirium/ dementia as an outcome</p> <p>p7 para 2</p>                                                                                          |
| <b>7</b>    | <b>Sample size</b>                                                                                                                                                                                                                                                                                                       |
| a           | <p>Describe how sample size was determined and provide a rationale</p> <p>The total sample size was opportunistically determined by clinical need for further investigation of alternative aetiologies of persistent delirium and patient/ next of kin consent</p> <p>p5 para 3</p>                                      |
| <b>8</b>    | <b>Statistical analysis</b>                                                                                                                                                                                                                                                                                              |
| a           | <p>Account for clinical and biomarker missing data in the analysis plan based on the design of the study</p> <p>There were no missing biomarkers or delirium data. One missing APACHE score was imputed to nearest similar patient with comparable other demographics and measures of acute illness</p> <p>p7 para 2</p> |
| b           | <p>State how confounding variables were accounted for in the analysis</p> <p>Appropriate confounders were included into the propensity score construction of each designated exposure</p> <p>p7 para 2</p>                                                                                                               |
| <b>9</b>    | <b>Univariate and multivariable analysis</b>                                                                                                                                                                                                                                                                             |
| a           | <p>Report the estimated effect size or the p values with their Confidence Intervals (CI)</p> <p>NA – no multivariate/ univariate models were used.</p>                                                                                                                                                                   |
| b           | <p>Specify whether the biomarker was dichotomised using a cut-point and/or threshold</p>                                                                                                                                                                                                                                 |

| Item number | REDEEMS items                                                                                                                                                                                                                                                                                      |
|-------------|----------------------------------------------------------------------------------------------------------------------------------------------------------------------------------------------------------------------------------------------------------------------------------------------------|
|             | <p>Biomarker was a continuous outcome measure</p> <p>p6 para 3</p>                                                                                                                                                                                                                                 |
| c           | <p>Specify the number of included participants and reasons for attrition or missing data</p> <p>Delirium model – all (35) patients included<br/> Dementia model – 34 patients included, one excluded due to being outside caliper threshold for matching of propensity scores</p> <p>p7 para 2</p> |
| d           | <p>Describe how model assumptions were verified (multivariable)</p> <p>NA – no multivariate/ univariate models were used.</p>                                                                                                                                                                      |

\* If the study is not testing a specific hypothesis, authors should state that it is undertaking an un-biased or exploratory approach

**Supplementary Table 2:** Intraplate coefficients of variations

| Plex     | Intra-Plate %CV |             |             |
|----------|-----------------|-------------|-------------|
|          | average         | stdev       | %CV         |
| AB40     | 163.3686117     | 3.985435137 | 2.439535414 |
| AB42     | 6.995413781     | 0.263530674 | 3.767192087 |
| GFAP     | 155.7382131     | 6.176725396 | 3.966094943 |
| NFL      | 29.89151973     | 1.342539092 | 4.491371145 |
| pTau-181 | 3.807900714     | 0.250452889 | 6.577190643 |

**Supplementary references**

1. Gaetani L, Höglund K, Parnetti L, et al. A new enzyme-linked immunosorbent assay for neurofilament light in cerebrospinal fluid: analytical validation and clinical evaluation. *Alzheimers Res Ther.* 2018;10(1):8. doi:10.1186/s13195-018-0339-1
2. Rosengren LE, Ahlsén G, Belfrage M, Gillberg C, Haglid KG, Hamberger A. A sensitive ELISA for glial fibrillary acidic protein: application in CSF of children. *J Neurosci Methods.* 1992;44(2-3):113-119. doi:10.1016/0165-0270(92)90004-w
3. Hansson O, Lehmann S, Otto M, Zetterberg H, Lewczuk P. Advantages and disadvantages of the use of the CSF Amyloid  $\beta$  (A $\beta$ ) 42/40 ratio in the diagnosis of Alzheimer's Disease. *Alzheimers Res Ther.* 2019;11(1):34. doi:10.1186/s13195-019-0485-0
